# Supplementary figures and images for: A bio-inspired fluorescent nano-injectable hydrogel as a synergistic drug delivery system
Source: Royal Society of Chemistry journal article supplement (doi:10.1039/d0nj05719c), 2021-01-01

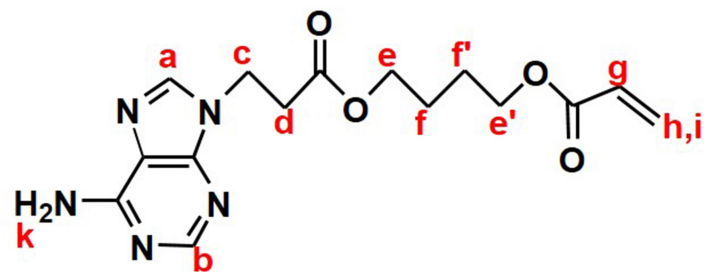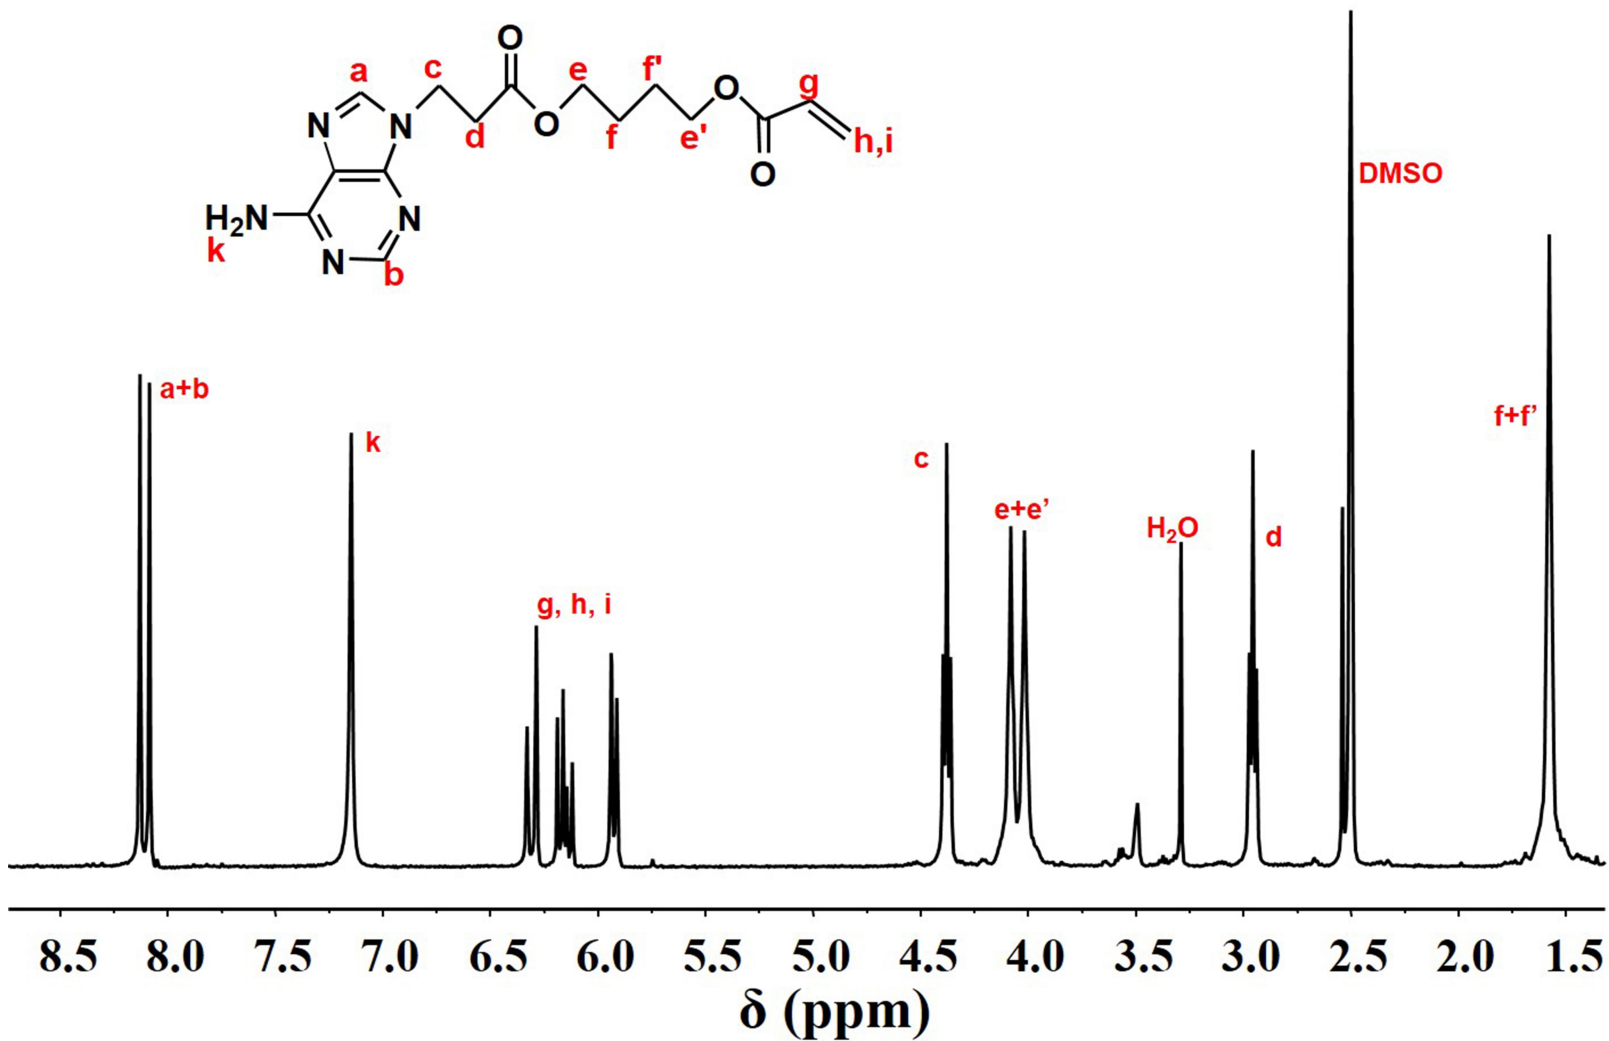

Supplement: d0nj05719c2.pdf [file d0nj05719c2.pdf]

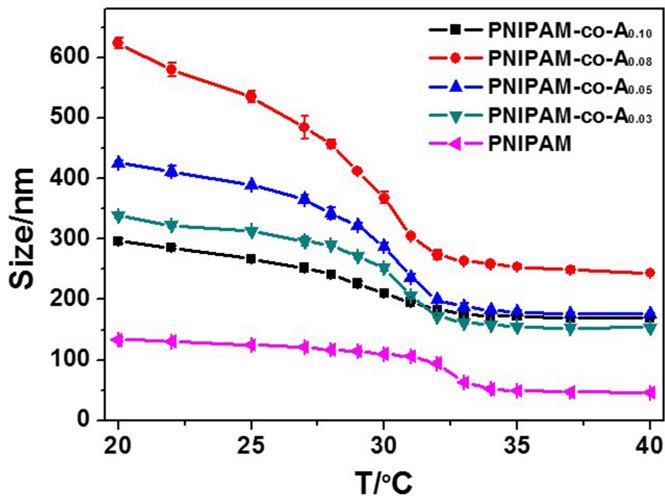

Supplement: d0nj05719c3.pdf [file d0nj05719c3.pdf]
